# Supplementary material for: “Young at heart”: Regenerative potential linked to immature cardiac phenotypes
Source: PubMed Central journal article supplement (PMC4796039; doi:10.1016/j.yjmcc.2016.01.026), 2016-03

## SUPPLEMENTAL MATERIAL

### **“Young at Heart”:**

#### **Regenerative Potential Linked to Immature Cardiac Phenotypes**

Renata S.M. Gomes<sup>1</sup>, Philipp Skroblin<sup>1</sup>, Alex B. Munster<sup>1</sup>, Hannah Tomlins<sup>1</sup>, Sarah R. Langley<sup>1</sup>, Anna Zampetaki<sup>1</sup>, Xiaoke Yin<sup>1</sup>, Fiona Wardle<sup>2</sup>, Manuel Mayr<sup>1\*</sup>

<sup>1</sup> King's British Heart Foundation Centre, King's College London, London, UK;

<sup>2</sup> Cardiovascular Development, Randall Division, King's College London, UK.

#### **Corresponding author:**

Prof. Manuel Mayr, King's British Heart Foundation Centre, King's College London,  
125 Coldharbour Lane, London SE5 9NU, UK.

E-mail address: [manuel.mayr@kcl.ac.uk](mailto:manuel.mayr@kcl.ac.uk)

## **Extended Methods**

### **RNA extraction, reverse transcription and quantitative real-time PCR**

Single mouse hearts or pools of two zebrafish hearts were homogenized in QIAzol Lysis reagent using FastPrep Tubes, Lysing Matrix D (MP Biomedicals Europe, France) and total RNA was subsequently isolated with the miRNeasy mini RNA extraction kit (QIAGEN, Germany) (1). For gene expression analysis, 200ng RNA was reverse transcribed using the VILO Superscript cDNA synthesis kit (Life Technologies). The qPCR reaction mix was comprised of 2.5µl TaqMan® Universal PCR Master Mix, No AmpErase® UNG (Life Technologies, UK), 0.25µl of the respective FAM-labelled Taqman assay (Life Technologies, UK), and 2.25µl diluted RT product corresponding to 1ng RNA. MiRNAs (50 ng input material) were reverse transcribed using the TaqMan® MicroRNA Reverse Transcription Kit, Megaplex rodent primers Pool A (Life Technologies, UK). 2.25µl diluted RT product corresponding to 0.225ng RNA were used for qPCR. QPCRs were run on a ViiA7 qPCR machine (Life Technologies, UK) and the  $\Delta\Delta C_t$  method was used to determine the relative quantification of targets. Taqman assays used for qPCR are listed in **Supplementary Table 1**.

### **Protein extraction and immunoblot analysis**

Hearts were weighed and powdered in liquid nitrogen and crushed using a mortar and pestle. Ice-cold lysis buffer, at a ratio of 100µl per 10mg of tissue was added. The lysis buffer consisted of a combination of 100mM Tris-HCl pH 7.4, 1% Triton X-100, protease and phosphatase inhibitors (Sigma, UK) (2). Samples were centrifuged at 14,000g for 10 minutes at 4 °C. The soluble and non-soluble fractions were separated and added to Laemmli buffer and denatured at 98°C for 5min before being briefly

centrifuged, this after quantification of protein concentration using the BCA assay (Thermo Scientific, USA). 10µg of protein were loaded per lane, separated on 4-12% gradient gels (Life Technologies, UK) at 130-170V for 100-120min in NuPage MOPS SDS Running Buffer (Life Technologies, UK) diluted with distilled water. Subsequently, the samples were transferred to nitrocellulose membranes (GE Healthcare, USA) in ice-cold transfer buffer (25mM Tris Base and 200mM Glycine dissolved in 20% methanol) (3). Next, membranes were blocked in 5% milk in PBS (PBS, Lonza, UK) with 0.1% Tween (PBST) for 1hr on a shaker at room temperature. After a brief wash in PBST, they were incubated overnight with primary antibodies in 5% BSA (Sigma Aldrich, UK) with 0.01% sodium azide (Sigma Aldrich, UK) (Table 2). The following day, after 3 washes in PBST, 15 min each, the membranes were incubated for 1hr at room temperature with the HRP-labelled secondary antibody diluted in 5% milk in PBST, according to the source of the primary antibody. The membranes were washed in PBST 3 times for 15 min and developed using ECL western blotting detection reagent using X-ray films (FUJIFILM, USA). Immunoblots were quantified by densitometry using Image-J software. The following primary antibodies were purchased from Abcam, UK: monoclonal Troponin T (ab130003) and polyclonal nebulin (ab99420) both used at 4 µg/ml. Monoclonal myozenin 2 (sc-377359) from Santa Cruz was used at 1:100 dilution. Immunoreactivity was visualized with horseradish peroxidase-linked rabbit anti-mouse or swine anti-rabbit (DAKO) at 1:2000.

### **Difference in-gel electrophoresis**

The heart tissue was homogenized in lysis buffer (9.5M urea, 2% w/v CHAPS, 1% w/v DTT and 0.8% Pharmalyte pH3-10) with Lysing matrix D (MP Biomedicals, Solon, USA) using FastPrep 120 (Krackeler Scientific Inc, USA) (4). Samples were

further processed using ReadyPrep 2D Cleanup kit (Bio-Rad, UK). The samples were then resuspended in DIGE lysis buffer (8M urea, 4% w/v CHAPS, 30mM TrisHCl, pH 8.5). Protein samples were labelled with Cy3 or Cy5 fluorescent dye (DIGE Fluor minimal dyes, GE Healthcare, USA) and mixed with Cy2-labelled internal standard. Following overnight rehydration, IPG dry strips (pH3-10, nonlinear, 18cm, GE Healthcare, USA) were focused on the IPGphor for 29kVhr. The strips were subsequently reduced in equilibration solution (6M urea, 2% w/v SDS, 30% w/v glycerol, 50mM Tris, pH 8.8) with 10mg/mL DTT for 15min, and alkylated in equilibration solution with 48mg/mL iodoacetamide for another 15min before put on top of large format 12% polyacrylamide gels. SDS-PAGE was performed in Ettan Dalt six electrophoresis system (GE Healthcare, USA) at 30W/gel. The gels were then scanned in Ettan DIGE imager (GE Healthcare, USA) and the images were analysed using DeCyder version 7.0 (GE Healthcare, USA). Differentially expressed spots of interest were manually excised for further MS analysis.

### **Liquid chromatography tandem mass spectrometry (LC-MS/MS)**

Tryptic in-gel digestion was performed overnight using the Investigator ProGest (DigiLab,USA) robotic digestion system (5). The digested peptide solution was dried using a SpeedVac concentrator (Thermo Fisher Scientific, UK) and resuspended in 20 $\mu$ l of 0.1% formic acid. The samples were separated by nano-flow HPLC on a reverse phase column (C18 PepMap100, 3 $\mu$ m, 100 Å, 25cm; Thermo Scientific, USA) before injected to an LTQ Orbitrap XL mass spectrometer (Thermo Scientific, USA). Spectra were collected from the mass analyzer (Orbitrap) using full ion scan mode over the  $m/z$  range 450-1600 followed by data-dependent MS/MS scans on 6 most abundant ions with dynamic exclusion. Database searches were performed using Mascot version 2.3.01 against the IPI mouse database version 3.87 (59534 entries)

and the IPI zebrafish database version 3.86 (40470 entries), or UniProt/SwissProt mouse database version 2013\_08 (16619 entries), with the following parameters: precursor tolerance 10ppm, fragment tolerance 0.8Da, carbamidomethylation on cysteines as fixed modification and oxidation on methionine as variable modification, 2 missed cleavages were allowed. Scaffold software (Version 4.3.2, Proteome Software inc, Portland, OR) was then used to validate MS/MS based peptides and protein identification and assign spectral counts across the individual samples. Protein identifications were accepted if they could be established at greater than 99.0% probability with at least 2 unique peptides.

### **Statistical and bioinformatic analysis**

Principal component analysis (PCA) was used to visualize multidimensional DIGE data using DeCyder version 7.0 (GE Healthcare, USA). Significance of differential transcript or protein expression was assessed using unpaired Student's t-test with unequal variance. Results were given as means±SD. P-values  $\leq 0.05$  were considered significant.

### **Online References**

1. Abonnenc M, Nabebaccus AA, Mayr U, Barallobre-Barreiro J, Dong X, Cuello F, et al. Extracellular matrix secretion by cardiac fibroblasts: role of microRNA-29b and microRNA-30c. *Circ Res* 2013;113:1138-47.
2. Cuello F, Shankar-Hari M, Mayr U, Yin X, Marshall M, Suna G, et al. Redox state of pentraxin 3 as a novel biomarker for resolution of inflammation and survival in sepsis. *Mol Cell Proteomics* 2014;13:2545-57.
3. Didangelos A, Mayr U, Monaco C, Mayr M. Novel Role of ADAMTS-5 Protein in Proteoglycan Turnover and Lipoprotein Retention in Atherosclerosis. *J Biol Chem* 2012;287:19341-5.
4. Yin X, Dwyer J, Langley S, Mayr U, Xing Q, Drozdov I, et al. Effects of perhexiline-induced fuel switch on the cardiac proteome and metabolome. *J Mol Cell Cardiol* 2013;55:27-30.
5. Yin X, Bern M, Xing Q, Ho J, Viner R, Mayr M. Glycoproteomic analysis of the secretome of human endothelial cells. *Mol Cell Proteomics* 2013;12:956-78.

**Supplementary Table 1.** Taqman assays used for qPCR.

| <b>Gene</b> | <b>Species</b>  | <b>Taqman Assay ID</b> |
|-------------|-----------------|------------------------|
| 18S         | Mouse           | Mm03928990_g1          |
| Myh6        | Mouse           | Mm00440359_m1          |
| Myh7        | Mouse           | Mm01319006_g1          |
| Myh7b       | Mouse           | Mm01249941_m1          |
| Myl2        | Mouse           | Mm00440384_m1          |
| Myl3        | Mouse           | Mm00803034_m1          |
| Myl7        | Mouse           | Mm01183005_g1          |
| tnnc1       | Mouse           | Mm00437115_g1          |
| tnnc2       | Mouse           | Mm01243775_g1          |
| tnni1       | Mouse           | Mm00502426_m1          |
| tnni2       | Mouse           | Mm00437157_g1          |
| tnni3       | Mouse           | Mm00437164_m1          |
| tnnt1       | Mouse           | Mm00449089_m1          |
| Tnnt2       | Mouse           | Mm01290256_m1          |
| Tnnt3       | Mouse           | Mm01137842_g1          |
| Tnnt3       | Mouse           | Mm01268863_m1          |
| miR-1       | Mouse/Zebrafish | 2222                   |
| miR-499     | Mouse/Zebrafish | 1352                   |
| miR-133a    | Mouse/Zebrafish | 2246                   |
| miR-133b    | Mouse/Zebrafish | 2247                   |
| 18S         | Zebrafish       | Hs99999901_s1          |
| myh6        | Zebrafish       | Dr03112899_s1          |
| myl2        | Zebrafish       | Dr03142386_m1          |
| myl7        | Zebrafish       | Dr03105697_m1          |
| tnnc1a      | Zebrafish       | Dr03106128_mH          |
| tnnc1b      | Zebrafish       | Dr03089208_g1          |
| tnnc2       | Zebrafish       | Dr03432983_g1          |
| tnni1a      | Zebrafish       | Dr03146635_m1          |

|             |           |               |
|-------------|-----------|---------------|
| tnni1b      | Zebrafish | Dr03090193_m1 |
| tnni2a.1    | Zebrafish | Dr03102546_m1 |
| tnni2b.1    | Zebrafish | Dr03083605_g1 |
| tnnt1       | Zebrafish | Dr03201591_s1 |
| tnnt2a      | Zebrafish | Dr03131740_g1 |
| tnnt2d      | Zebrafish | Dr03090816_g1 |
| tnnt3a      | Zebrafish | Dr03150378_g1 |
| tnnt3b      | Zebrafish | Dr03086581_m1 |
| vmhc/myh7bb | Zebrafish | Dr03431115_g1 |
| zgc:66286   | Zebrafish | Dr03113522_m1 |

**Supplementary Table 2. Identifications of selected protein spots of adult mice hearts.**

| Spot | Protein name                                                                                            | Accession Number | Mw (Da) | Protein identification probability | #unique peptides | #unique spectra | #total spectra | Percentage sequence coverage |
|------|---------------------------------------------------------------------------------------------------------|------------------|---------|------------------------------------|------------------|-----------------|----------------|------------------------------|
| G01  | Myosin regulatory light chain 2, ventricular/cardiac muscle isoform                                     | IPI00555015      | 18,865  | 100.0%                             | 6                | 8               | 15             | 35.5%                        |
| G02  | Myosin regulatory light chain 2, ventricular/cardiac muscle isoform                                     | IPI00555015      | 18,865  | 100.0%                             | 9                | 15              | 28             | 38.0%                        |
| G03  | Myosin regulatory light chain 2, ventricular/cardiac muscle isoform                                     | IPI00555015      | 18,865  | 100.0%                             | 11               | 15              | 24             | 56.0%                        |
| G04  | Myosin light chain 3                                                                                    | IPI00133392      | 22,422  | 100.0%                             | 7                | 12              | 21             | 55.9%                        |
| G05  | Myosin light chain 3                                                                                    | IPI00133392      | 22,422  | 100.0%                             | 8                | 16              | 26             | 56.9%                        |
| G06  | Isoform Smooth muscle of Myosin light polypeptide 6                                                     | IPI00354819      | 16,961  | 100.0%                             | 4                | 5               | 8              | 32.5%                        |
| G06  | ATP synthase subunit delta, mitochondrial                                                               | IPI00453777      | 17,600  | 100.0%                             | 3                | 5               | 8              | 17.3%                        |
| G07  | Cytochrome c oxidase subunit 5A, mitochondrial                                                          | IPI00120719      | 16,102  | 100.0%                             | 4                | 4               | 7              | 21.9%                        |
| G08  | Fatty acid-binding protein, heart                                                                       | IPI00230124      | 14,819  | 100.0%                             | 8                | 11              | 18             | 57.9%                        |
| G09  | NADH dehydrogenase [ubiquinone] iron-sulfur protein 8, mitochondrial                                    | IPI00170093      | 24,039  | 100.0%                             | 2                | 3               | 4              | 13.7%                        |
| G10  | apolipoprotein A-I preproprotein                                                                        | IPI00877236      | 30,615  | 100.0%                             | 6                | 8               | 15             | 20.8%                        |
| G11  | Isoform 1 of NADH dehydrogenase [ubiquinone] flavoprotein 2, mitochondrial                              | IPI00169925      | 27,286  | 100.0%                             | 6                | 10              | 18             | 35.1%                        |
| G12  | Thioredoxin-dependent peroxide reductase, mitochondrial                                                 | IPI00116192      | 28,127  | 100.0%                             | 2                | 2               | 3              | 8.2%                         |
| G13  | ATP synthase subunit beta, mitochondrial                                                                | IPI00468481      | 56,301  | 100.0%                             | 7                | 8               | 11             | 16.6%                        |
| G14  | Isoform 1 of 60 kDa heat shock protein, mitochondrial                                                   | IPI00308885      | 60,957  | 100.0%                             | 5                | 6               | 8              | 10.6%                        |
| G15  | Isoform 1 of 60 kDa heat shock protein, mitochondrial                                                   | IPI00308885      | 60,957  | 100.0%                             | 13               | 15              | 26             | 37.5%                        |
| G16  | NADH-ubiquinone oxidoreductase 75 kDa subunit, mitochondrial                                            | IPI00308882      | 79,778  | 100.0%                             | 21               | 31              | 54             | 33.3%                        |
| G17  | NADH-ubiquinone oxidoreductase 75 kDa subunit, mitochondrial                                            | IPI00308882      | 79,778  | 100.0%                             | 20               | 28              | 51             | 30.1%                        |
| G18  | Stress-70 protein, mitochondrial                                                                        | IPI00133903      | 73,529  | 100.0%                             | 10               | 11              | 18             | 20.3%                        |
| G18  | Heat shock cognate 71 kDa protein                                                                       | IPI00323357      | 70,873  | 100.0%                             | 9                | 12              | 18             | 18.4%                        |
| G19  | Stress-70 protein, mitochondrial                                                                        | IPI00133903      | 73,529  | 100.0%                             | 11               | 13              | 23             | 18.9%                        |
| G20  | Stress-70 protein, mitochondrial                                                                        | IPI00133903      | 73,529  | 100.0%                             | 2                | 2               | 3              | 4.3%                         |
| G20  | Heat shock cognate 71 kDa protein                                                                       | IPI00323357      | 70,873  | 100.0%                             | 2                | 2               | 3              | 2.9%                         |
| G21  | Serum albumin                                                                                           | IPI00131695      | 68,693  | 100.0%                             | 14               | 15              | 23             | 20.4%                        |
| G22  | Dihydropolyllysine-residue acetyltransferase component of pyruvate dehydrogenase complex, mitochondrial | IPI00153660      | 67,943  | 100.0%                             | 6                | 10              | 18             | 10.4%                        |
| G23  | Serotransferrin                                                                                         | IPI00139788      | 76,724  | 100.0%                             | 6                | 9               | 15             | 12.2%                        |
| G24  | Serotransferrin                                                                                         | IPI00139788      | 76,724  | 100.0%                             | 16               | 21              | 37             | 31.1%                        |
| G25  | Serotransferrin                                                                                         | IPI00139788      | 76,724  | 100.0%                             | 14               | 15              | 26             | 24.0%                        |
| G26  | Aconitate hydratase, mitochondrial                                                                      | IPI00116074      | 85,466  | 100.0%                             | 24               | 33              | 58             | 32.4%                        |
| G27  | Succinate dehydrogenase [ubiquinone] flavoprotein subunit, mitochondrial                                | IPI00230351      | 72,586  | 100.0%                             | 18               | 22              | 35             | 31.6%                        |
| G28  | Unidentified                                                                                            | -                | -       | -                                  | -                | -               | -              | -                            |
| G29  | Dihydropolyl dehydrogenase, mitochondrial                                                               | IPI00874456      | 54,599  | 100.0%                             | 3                | 3               | 3              | 5.7%                         |
| G29  | Isoform M1 of Pyruvate kinase isozymes M1/M2                                                            | IPI00845840      | 57,986  | 100.0%                             | 2                | 2               | 4              | 3.4%                         |
| G30  | Isoform M1 of Pyruvate kinase isozymes M1/M2                                                            | IPI00845840      | 57,986  | 100.0%                             | 14               | 18              | 34             | 35.2%                        |
| G31  | Trifunctional enzyme subunit beta, mitochondrial                                                        | IPI00115607      | 51,388  | 100.0%                             | 18               | 23              | 37             | 37.9%                        |
| G32  | Alpha-enolase                                                                                           | IPI00462072      | 47,142  | 100.0%                             | 6                | 8               | 17             | 27.6%                        |
| G33  | Beta-enolase                                                                                            | IPI00228548      | 47,026  | 100.0%                             | 6                | 8               | 13             | 24.2%                        |
| G34  | Malate dehydrogenase, mitochondrial                                                                     | IPI00323592      | 35,612  | 100.0%                             | 8                | 9               | 16             | 43.8%                        |
| G35  | Succinyl-CoA ligase [GDP-forming] subunit alpha, mitochondrial                                          | IPI00406442      | 36,155  | 100.0%                             | 3                | 3               | 6              | 11.6%                        |
| G36  | Aldose reductase                                                                                        | IPI00223757      | 35,733  | 100.0%                             | 10               | 12              | 19             | 31.6%                        |
| G37  | Myosin light chain 3                                                                                    | IPI00133392      | 22,422  | 100.0%                             | 2                | 2               | 3              | 20.6%                        |
| G37  | Hydroxyacyl-coenzyme A dehydrogenase, mitochondrial                                                     | IPI00121105      | 34,465  | 100.0%                             | 3                | 3               | 3              | 13.4%                        |
| G38  | Hydroxyacyl-coenzyme A dehydrogenase, mitochondrial                                                     | IPI00121105      | 34,465  | 100.0%                             | 5                | 5               | 7              | 13.7%                        |
| G39  | Electron transfer flavoprotein subunit beta                                                             | IPI00121440      | 27,623  | 100.0%                             | 14               | 18              | 31             | 55.7%                        |
| G40  | Peroxioredoxin-1                                                                                        | IPI00121788      | 22,178  | 100.0%                             | 7                | 8               | 15             | 33.2%                        |
| G41  | ATP synthase subunit O, mitochondrial                                                                   | IPI00118986      | 23,364  | 100.0%                             | 4                | 5               | 12             | 22.1%                        |
| G42  | Superoxide dismutase [Mn], mitochondrial                                                                | IPI00109109      | 24,603  | 100.0%                             | 5                | 8               | 13             | 25.7%                        |
| G43  | Alpha-crystallin B chain                                                                                | IPI00138274      | 20,069  | 100.0%                             | 6                | 7               | 14             | 29.7%                        |
| G44  | Nucleoside diphosphate kinase B                                                                         | IPI00127417      | 17,363  | 100.0%                             | 6                | 10              | 17             | 40.1%                        |
| G45  | Myoglobin                                                                                               | IPI00230760      | 17,070  | 100.0%                             | 4                | 5               | 9              | 37.0%                        |
| G46  | Myoglobin                                                                                               | IPI00230760      | 17,070  | 100.0%                             | 11               | 14              | 29             | 60.4%                        |
| G47  | Hemoglobin alpha, adult chain 2                                                                         | IPI00845802      | 15,112  | 100.0%                             | 6                | 9               | 16             | 62.0%                        |
| G48  | Cytochrome c oxidase subunit 6B1                                                                        | IPI00225390      | 10,072  | 100.0%                             | 2                | 2               | 4              | 24.4%                        |



**Supplementary Table 3. Identifications of selected protein spots of adult zebrafish hearts.**

| Spot | Protein name                                                       | Accession Number | Mw (Da) | Protein identification probability | #unique peptides | #unique spectra | #total spectra | Percentage sequence coverage |
|------|--------------------------------------------------------------------|------------------|---------|------------------------------------|------------------|-----------------|----------------|------------------------------|
| R01  | Cardiac myosin light chain 2                                       | IPI00481849      | 19,021  | 100.0%                             | 6                | 8               | 15             | 38.4%                        |
| R02  | Cardiac myosin light chain 2                                       | IPI00481849      | 19,021  | 100.0%                             | 9                | 13              | 25             | 45.3%                        |
| R03  | Cardiac myosin light chain 2                                       | IPI00481849      | 19,021  | 100.0%                             | 11               | 18              | 26             | 62.8%                        |
| R04  | Cardiac myosin light chain 1                                       | IPI00616566      | 21,865  | 100.0%                             | 11               | 16              | 24             | 56.6%                        |
| R05  | Cardiac myosin light chain 1                                       | IPI00616566      | 21,865  | 100.0%                             | 15               | 27              | 44             | 65.8%                        |
| R06  | Unidentified                                                       | -                | -       | -                                  | -                | -               | -              | -                            |
| R07  | Cytochrome c oxidase subunit Vaa                                   | IPI00488350      | 15,897  | 100.0%                             | 2                | 2               | 3              | 18.4%                        |
| R08  | Fatty acid binding protein 3, muscle and heart                     | IPI00491514      | 14,882  | 100.0%                             | 4                | 4               | 6              | 26.3%                        |
| R09  | Histone H4                                                         | IPI00482809      | 11,368  | 100.0%                             | 4                | 4               | 7              | 40.8%                        |
| R10  | NADH dehydrogenase (Ubiquinone) Fe-S protein 3                     | IPI00503659      | 29,484  | 100.0%                             | 2                | 4               | 7              | 9.8%                         |
| R11  | Cardiac myosin light chain 1                                       | IPI00616566      | 21,865  | 100.0%                             | 3                | 4               | 6              | 14.8%                        |
| R12  | Apolipoprotein A (apoa1b)                                          | IPI00994508      | 30,140  | 100.0%                             | 9                | 12              | 22             | 26.1%                        |
| R13  | ATP synthase subunit beta                                          | IPI00897805      | 56,476  | 100.0%                             | 4                | 5               | 5              | 20.2%                        |
| R14  | Heat shock 60kD protein 1 (Chaperonin)                             | IPI00508003      | 61,197  | 100.0%                             | 14               | 16              | 24             | 24.0%                        |
| R15  | Heat shock 60kD protein 1 (Chaperonin)                             | IPI00508003      | 61,197  | 100.0%                             | 17               | 21              | 36             | 41.7%                        |
| R16  | Uncharacterized protein                                            | IPI00628054      | 72,714  | 100.0%                             | 4                | 4               | 7              | 5.7%                         |
| R17  | Gesolin A                                                          | IPI01016654      | 80,625  | 100.0%                             | 8                | 10              | 20             | 19.2%                        |
| R18  | NADH dehydrogenase (Ubiquinone) Fe-S protein 1                     | IPI00500466      | 79,433  | 100.0%                             | 15               | 15              | 26             | 21.2%                        |
| R18  | Ventricular myosin heavy chain-like protein                        | IPI00616127      | 224,172 | 100.0%                             | 22               | 26              | 43             | 10.6%                        |
| R19  | NADH dehydrogenase (Ubiquinone) Fe-S protein 1                     | IPI00500466      | 79,433  | 100.0%                             | 19               | 23              | 41             | 24.8%                        |
| R19  | Ventricular myosin heavy chain-like protein                        | IPI00616127      | 224,172 | 100.0%                             | 13               | 16              | 24             | 7.8%                         |
| R20  | NADH dehydrogenase (Ubiquinone) Fe-S protein 1                     | IPI00500466      | 79,433  | 100.0%                             | 21               | 24              | 44             | 25.7%                        |
| R21  | NADH dehydrogenase (Ubiquinone) Fe-S protein 1                     | IPI00500466      | 79,433  | 100.0%                             | 3                | 3               | 5              | 4.1%                         |
| R22  | Acetyltransferase component of pyruvate dehydrogenase complex      | IPI00492140      | 69,208  | 100.0%                             | 4                | 6               | 12             | 9.7%                         |
| R23  | Aconitase 2, mitochondrial                                         | IPI00483652      | 84,862  | 100.0%                             | 8                | 9               | 17             | 19.3%                        |
| R24  | Aconitase 2, mitochondrial                                         | IPI00483652      | 84,862  | 100.0%                             | 10               | 10              | 19             | 18.7%                        |
| R25  | Aconitase 2, mitochondrial                                         | IPI00483652      | 84,862  | 100.0%                             | 13               | 15              | 27             | 26.5%                        |
| R26  | Aconitase 2, mitochondrial                                         | IPI00483652      | 84,862  | 100.0%                             | 15               | 18              | 30             | 29.2%                        |
| R27  | Transferrin                                                        | IPI00972722      | 73,533  | 100.0%                             | 12               | 14              | 22             | 23.1%                        |
| R28  | Unidentified                                                       | -                | -       | -                                  | -                | -               | -              | -                            |
| R29  | Fibrinogen, B beta polypeptide                                     | IPI00501169      | 54,408  | 100.0%                             | 8                | 8               | 14             | 19.6%                        |
| R30  | Fibrinogen, B beta polypeptide                                     | IPI00501169      | 54,408  | 100.0%                             | 16               | 20              | 34             | 37.5%                        |
| R31  | Elongation factor 1-alpha                                          | IPI00512240      | 50,048  | 100.0%                             | 6                | 8               | 13             | 20.1%                        |
| R32  | Enolase                                                            | IPI00483215      | 47,075  | 100.0%                             | 8                | 9               | 17             | 27.3%                        |
| R32  | beta-enolase                                                       | IPI00490877      | 47,473  | 100.0%                             | 9                | 14              | 23             | 24.0%                        |
| R33  | beta-enolase                                                       | IPI00490877      | 47,473  | 100.0%                             | 14               | 22              | 38             | 37.4%                        |
| R34  | Glyceraldehyde-3-phosphate dehydrogenase                           | IPI00497753      | 35,784  | 100.0%                             | 8                | 11              | 21             | 32.4%                        |
| R35  | Voltage-dependent anion channel 3                                  | IPI00851926      | 32,854  | 100.0%                             | 5                | 6               | 10             | 26.0%                        |
| R36  | Malate dehydrogenase                                               | IPI00495240      | 36,258  | 100.0%                             | 7                | 12              | 23             | 22.8%                        |
| R37  | Malate dehydrogenase                                               | IPI00512157      | 35,420  | 100.0%                             | 15               | 23              | 37             | 52.5%                        |
| R38  | Four and a half LIM domains protein a                              | IPI00497720      | 39,095  | 100.0%                             | 4                | 4               | 7              | 14.7%                        |
| R38  | Malate dehydrogenase                                               | IPI00512157      | 35,420  | 100.0%                             | 4                | 4               | 7              | 13.4%                        |
| R38  | ATP synthase subunit alpha                                         | IPI00491975      | 59,745  | 100.0%                             | 5                | 5               | 8              | 10.7%                        |
| R39  | Myoglobin                                                          | IPI00490915      | 15,584  | 100.0%                             | 8                | 11              | 19             | 76.2%                        |
| R40  | Glutathione S-transferase pi                                       | IPI00502668      | 23,528  | 100.0%                             | 5                | 5               | 9              | 23.1%                        |
| R40  | Glutathione S-transferase kappa 1                                  | IPI00489672      | 25,908  | 100.0%                             | 4                | 5               | 9              | 16.2%                        |
| R41  | ATP synthase oligomycin sensitivity conferral protein              | IPI00483070      | 22,483  | 100.0%                             | 6                | 9               | 17             | 40.7%                        |
| R42  | Superoxide dismutase                                               | IPI00486525      | 25,008  | 100.0%                             | 4                | 7               | 11             | 19.6%                        |
| R43  | ATP synthase, H+ transporting, mitochondrial F0 complex, subunit d | IPI00484712      | 18,259  | 100.0%                             | 8                | 14              | 23             | 36.0%                        |
| R44  | Muscle cofilin 2                                                   | IPI00511345      | 18,771  | 100.0%                             | 3                | 3               | 6              | 23.0%                        |
| R45  | Nucleoside diphosphate kinase                                      | IPI00497989      | 17,124  | 100.0%                             | 7                | 14              | 21             | 53.6%                        |
| R46  | Peptidyl-prolyl cis-trans isomerase                                | IPI00497774      | 17,489  | 100.0%                             | 5                | 5               | 8              | 31.1%                        |
| R47  | Myoglobin                                                          | IPI00490915      | 15,584  | 100.0%                             | 18               | 27              | 49             | 85.0%                        |
| R48  | Unidentified                                                       | -                | -       | -                                  | -                | -               | -              | -                            |

**Supplementary Table 4. Identifications of differentially expressed protein spots between cardiomyocytes from Day 0 and adult mice.**

| No. | Protein name                                                                                              | UniProt ID  | pI   | Mw (Da) | # Unique peptide | # Unique spectrum | # Total spectrum | Sequence coverage | Day 0 vs Adult |           |
|-----|-----------------------------------------------------------------------------------------------------------|-------------|------|---------|------------------|-------------------|------------------|-------------------|----------------|-----------|
|     |                                                                                                           |             |      |         |                  |                   |                  |                   | T-test         | Av. Ratio |
| 1   | Calreticulin                                                                                              | CALR_MOUSE  | 4.33 | 46,347  | 11               | 12                | 20               | 27.90%            | 9.70E-07       | -3.66     |
| 2   | Tropomyosin alpha-1 chain                                                                                 | TPM1_MOUSE  | 4.69 | 32,681  | 5                | 5                 | 9                | 18.30%            | 0.00012        | -2.91     |
| 3   | 78 kDa glucose-regulated protein                                                                          | GRP78_MOUSE | 5.01 | 70,465  | 19               | 24                | 37               | 37.40%            | 4.30E-06       | -1.89     |
| 4   | Desmin                                                                                                    | DESM_MOUSE  | 5.21 | 53,498  | 12               | 12                | 22               | 27.70%            | 8.20E-05       | -2.84     |
| 4   | Vimentin                                                                                                  | VIME_MOUSE  | 5.05 | 53,556  | 14               | 16                | 23               | 41.20%            | 8.20E-05       | -2.84     |
| 4   | Myosin-6                                                                                                  | MYH6_MOUSE  | 5.57 | 223,565 | 20               | 21                | 34               | 11.70%            | 8.20E-05       | -2.84     |
| 5   | ATP synthase subunit beta, mitochondrial                                                                  | ATPB_MOUSE  | 4.99 | 51,749  | 13               | 18                | 29               | 36.30%            | 6.30E-05       | -4.20     |
| 5   | Myosin-6                                                                                                  | MYH6_MOUSE  | 5.57 | 223,565 | 17               | 19                | 28               | 10.60%            | 6.30E-05       | -4.20     |
| 6   | Unidentified                                                                                              | -           | -    | -       | -                | -                 | -                | -                 | 0.0051         | -3.17     |
| 7   | Alpha-fetoprotein                                                                                         | FETA_MOUSE  | 5.54 | 65,343  | 20               | 24                | 41               | 38.50%            | 0.00023        | -6.50     |
| 8   | Alpha-fetoprotein                                                                                         | FETA_MOUSE  | 5.54 | 65,343  | 23               | 29                | 47               | 45.30%            | 0.0002         | -7.71     |
| 8   | Myosin-6                                                                                                  | MYH6_MOUSE  | 5.57 | 223,565 | 23               | 28                | 48               | 10.70%            | 0.0002         | -7.71     |
| 9   | Heterogeneous nuclear ribonucleoprotein K                                                                 | HNRPK_MOUSE | 5.39 | 50,976  | 10               | 11                | 17               | 27.40%            | 0.03           | -2.55     |
| 9   | Desmin                                                                                                    | DESM_MOUSE  | 5.21 | 53,498  | 14               | 14                | 23               | 32.00%            | 0.03           | -2.55     |
| 9   | Myosin-6                                                                                                  | MYH6_MOUSE  | 5.57 | 223,565 | 15               | 15                | 24               | 8.36%             | 0.03           | -2.55     |
| 10  | Alpha-fetoprotein                                                                                         | FETA_MOUSE  | 5.54 | 65,343  | 20               | 28                | 47               | 44.80%            | 0.00054        | -6.30     |
| 10  | Myosin-6                                                                                                  | MYH6_MOUSE  | 5.57 | 223,565 | 22               | 26                | 43               | 11.10%            | 0.00054        | -6.30     |
| 11  | Gelsolin                                                                                                  | GELS_MOUSE  | 5.72 | 83,344  | 14               | 15                | 23               | 23.30%            | 0.0011         | -4.19     |
| 11  | Myosin-6                                                                                                  | MYH6_MOUSE  | 5.57 | 223,565 | 17               | 18                | 27               | 10.40%            | 0.0011         | -4.19     |
| 12  | Gelsolin                                                                                                  | GELS_MOUSE  | 5.72 | 83,344  | 22               | 27                | 44               | 36.80%            | 0.00036        | -6.01     |
| 13  | Dihydropyridyllysine-residue acetyltransferase component of pyruvate dehydrogenase complex, mitochondrial | ODP2_MOUSE  | 5.70 | 58,778  | 14               | 22                | 35               | 29.10%            | 0.0081         | 1.75      |
| 14  | Aconitate hydratase, mitochondrial                                                                        | ACON_MOUSE  | 8.08 | 85,464  | 12               | 12                | 17               | 19.00%            | 0.00023        | 1.75      |
| 15  | Unidentified                                                                                              | -           | -    | -       | -                | -                 | -                | -                 | 9.20E-06       | -3.36     |
| 16  | Tubulin beta-4B chain                                                                                     | TBB4B_MOUSE | 4.79 | 49,831  | 18               | 22                | 33               | 58.20%            | 6.50E-05       | -3.14     |
| 17  | ATP synthase subunit beta, mitochondrial                                                                  | ATPB_MOUSE  | 4.99 | 51,749  | 16               | 29                | 55               | 41.40%            | 5.70E-06       | 3.39      |
| 18  | Protein disulfide-isomerase A3                                                                            | PDIA3_MOUSE | 5.69 | 54,267  | 13               | 14                | 18               | 28.10%            | 1.40E-05       | -2.91     |
| 19  | T-complex protein 1 subunit epsilon                                                                       | TCPE_MOUSE  | 5.72 | 59,493  | 6                | 7                 | 10               | 14.00%            | 6.30E-06       | -2.95     |
| 20  | T-complex protein 1 subunit epsilon                                                                       | TCPE_MOUSE  | 5.72 | 59,493  | 16               | 19                | 30               | 37.90%            | 4.20E-05       | -3.18     |
| 21  | Unidentified                                                                                              | -           | -    | -       | -                | -                 | -                | -                 | 7.30E-06       | -3.69     |
| 22  | Adenylyl cyclase-associated protein 2                                                                     | CAP2_MOUSE  | 6.00 | 52,862  | 9                | 9                 | 13               | 20.20%            | 0.00082        | -2.15     |
| 22  | Bifunctional epoxide hydrolase 2                                                                          | HYES_MOUSE  | 5.85 | 62,515  | 11               | 13                | 23               | 22.00%            | 0.00082        | -2.15     |
| 23  | Unidentified                                                                                              | -           | -    | -       | -                | -                 | -                | -                 | 0.00039        | -3.33     |
| 24  | Dihydropyrimidinase-related protein 3                                                                     | DPYL3_MOUSE | 6.04 | 61,936  | 8                | 8                 | 13               | 20.20%            | 4.30E-05       | -3.69     |
| 25  | Elongation factor Tu, mitochondrial                                                                       | EFTU_MOUSE  | 6.20 | 44,971  | 18               | 27                | 42               | 51.80%            | 9.80E-05       | -2.89     |
| 26  | Hydroxysteroid dehydrogenase-like protein 2                                                               | HSDL2_MOUSE | 6.31 | 54,208  | 10               | 11                | 14               | 23.30%            | 0.01           | -2.61     |
| 26  | T-complex protein 1 subunit gamma                                                                         | TCPG_MOUSE  | 6.28 | 60,630  | 10               | 10                | 15               | 26.10%            | 0.01           | -2.61     |
| 26  | Stress-induced-phosphoprotein 1                                                                           | STIP1_MOUSE | 6.40 | 62,582  | 12               | 12                | 14               | 26.00%            | 0.01           | -2.61     |
| 27  | Aldehyde dehydrogenase X, mitochondrial                                                                   | AL1B1_MOUSE | 6.13 | 55,401  | 13               | 15                | 24               | 28.10%            | 0.0019         | -3.13     |
| 28  | Aldehyde dehydrogenase X, mitochondrial                                                                   | AL1B1_MOUSE | 6.13 | 55,401  | 5                | 6                 | 12               | 10.60%            | 0.00014        | -4.75     |
| 29  | ATP synthase subunit alpha, mitochondrial                                                                 | ATPA_MOUSE  | 8.28 | 55,310  | 18               | 22                | 39               | 40.50%            | 3.90E-05       | 2.94      |
| 30  | Actin, alpha cardiac muscle 1                                                                             | ACTC_MOUSE  | 5.23 | 41,785  | 12               | 18                | 46               | 34.70%            | 0.019          | 1.24      |
| 31  | Troponin T, cardiac muscle                                                                                | TNNT2_MOUSE | 4.98 | 35,694  | 12               | 17                | 28               | 32.20%            | 9.20E-07       | 3.60      |
| 32  | Creatine kinase B-type                                                                                    | KCRB_MOUSE  | 5.40 | 42,582  | 12               | 16                | 26               | 42.00%            | 0.00031        | -3.16     |
| 33  | Alpha-enolase                                                                                             | ENOA_MOUSE  | 6.36 | 47,010  | 14               | 17                | 31               | 35.90%            | 6.80E-06       | -3.89     |
| 34  | Alpha-enolase                                                                                             | ENOA_MOUSE  | 6.36 | 47,010  | 18               | 24                | 40               | 49.50%            | 5.20E-05       | -4.12     |
| 35  | Alpha-enolase                                                                                             | ENOA_MOUSE  | 6.36 | 47,010  | 18               | 30                | 48               | 46.50%            | 1.40E-05       | -4.20     |
| 36  | Pyruvate dehydrogenase E1 component subunit alpha, somatic form, mitochondrial                            | ODPA_MOUSE  | 6.78 | 40,181  | 5                | 6                 | 8                | 14.40%            | 0.0077         | -2.01     |
| 36  | Alpha-centractin                                                                                          | ACTZ_MOUSE  | 6.19 | 42,614  | 6                | 7                 | 11               | 23.90%            | 0.0077         | -2.01     |
| 37  | Fumarate hydratase, mitochondrial                                                                         | FUMH_MOUSE  | 7.88 | 49,921  | 13               | 14                | 19               | 39.60%            | 1.30E-05       | 2.81      |

|    |                                                                      |             |      |        |    |    |    |        |          |       |
|----|----------------------------------------------------------------------|-------------|------|--------|----|----|----|--------|----------|-------|
| 38 | 3-ketoacyl-CoA thiolase, mitochondrial                               | THIM_MOUSE  | 8.33 | 41,830 | 8  | 11 | 20 | 32.70% | 4.40E-05 | 4.40  |
| 38 | Creatine kinase S-type, mitochondrial                                | KCRS_MOUSE  | 7.72 | 43,387 | 11 | 14 | 20 | 32.00% | 4.40E-05 | 4.40  |
| 38 | Medium-chain specific acyl-CoA dehydrogenase, mitochondrial          | ACADM_MOUSE | 7.69 | 43,593 | 9  | 12 | 21 | 24.20% | 4.40E-05 | 4.40  |
| 38 | Phosphoglycerate kinase 1                                            | PGK1_MOUSE  | 8.02 | 44,419 | 11 | 17 | 29 | 37.20% | 4.40E-05 | 4.40  |
| 39 | 3-ketoacyl-CoA thiolase, mitochondrial                               | THIM_MOUSE  | 8.33 | 41,830 | 12 | 17 | 26 | 52.10% | 0.0011   | 4.18  |
| 40 | 3-ketoacyl-CoA thiolase, mitochondrial                               | THIM_MOUSE  | 8.33 | 41,830 | 12 | 16 | 26 | 49.40% | 0.00023  | 5.56  |
| 40 | Creatine kinase S-type, mitochondrial                                | KCRS_MOUSE  | 7.72 | 43,387 | 13 | 19 | 29 | 39.90% | 0.00023  | 5.56  |
| 40 | Phosphoglycerate kinase 1                                            | PGK1_MOUSE  | 8.02 | 44,419 | 17 | 24 | 36 | 49.40% | 0.00023  | 5.56  |
| 41 | 3-ketoacyl-CoA thiolase, mitochondrial                               | THIM_MOUSE  | 8.33 | 41,830 | 21 | 33 | 46 | 73.80% | 0.0013   | 2.86  |
| 42 | Tropomyosin alpha-1 chain                                            | TPM1_MOUSE  | 4.69 | 32,681 | 21 | 32 | 58 | 54.20% | 2.40E-05 | 2.03  |
| 43 | Elongation factor 1-delta                                            | EF1D_MOUSE  | 4.91 | 31,162 | 9  | 10 | 18 | 37.70% | 0.0001   | -2.68 |
| 44 | Pyruvate dehydrogenase E1 component subunit beta, mitochondrial      | ODPB_MOUSE  | 5.39 | 35,768 | 12 | 17 | 33 | 44.80% | 0.00023  | 2.14  |
| 46 | Isocitrate dehydrogenase [NAD] subunit alpha, mitochondrial          | IDH3A_MOUSE | 5.59 | 36,707 | 2  | 3  | 5  | 6.83%  | 3.20E-05 | 2.79  |
| 46 | Isocitrate dehydrogenase [NAD] subunit alpha, mitochondrial          | IDH3A_MOUSE | 5.59 | 36,707 | 11 | 13 | 19 | 35.20% | 0.011    | 1.24  |
| 47 | Malate dehydrogenase, cytoplasmic                                    | MDHC_MOUSE  | 6.16 | 36,380 | 10 | 12 | 27 | 35.90% | 0.00025  | 1.59  |
| 48 | Delta(3,5)-Delta(2,4)-dienoyl-CoA isomerase, mitochondrial           | ECH1_MOUSE  | 6.01 | 32,433 | 8  | 12 | 23 | 37.00% | 4.10E-06 | 5.39  |
| 49 | Myozenin-2                                                           | MYOZ2_MOUSE | 8.53 | 29,762 | 5  | 5  | 9  | 20.80% | 2.40E-05 | 4.64  |
| 49 | Four and a half LIM domains protein 2                                | FHL2_MOUSE  | 7.31 | 32,073 | 5  | 5  | 6  | 20.80% | 2.40E-05 | 4.64  |
| 49 | Malate dehydrogenase, cytoplasmic                                    | MDHC_MOUSE  | 6.16 | 36,380 | 4  | 4  | 7  | 14.40% | 2.40E-05 | 4.64  |
| 50 | Unidentified                                                         | -           | -    | -      | -  | -  | -  | -      | 0.0001   | 4.22  |
| 51 | Electron transfer flavoprotein subunit alpha, mitochondrial          | ETF_A_MOUSE | 8.62 | 35,009 | 8  | 14 | 25 | 35.70% | 8.20E-07 | 4.64  |
| 52 | Aldose reductase                                                     | ALDR_MOUSE  | 6.79 | 35,601 | 9  | 10 | 14 | 32.00% | 0.029    | -2.08 |
| 52 | Annexin A2                                                           | ANXA2_MOUSE | 7.53 | 38,545 | 13 | 15 | 23 | 38.30% | 0.029    | -2.08 |
| 53 | Malate dehydrogenase, mitochondrial                                  | MDHM_MOUSE  | 8.55 | 33,139 | 10 | 10 | 15 | 39.60% | 9.80E-06 | -1.79 |
| 53 | Glyceraldehyde-3-phosphate dehydrogenase                             | G3P_MOUSE   | 8.45 | 35,679 | 9  | 11 | 19 | 30.30% | 9.80E-06 | -1.79 |
| 53 | Annexin A2                                                           | ANXA2_MOUSE | 7.53 | 38,545 | 12 | 14 | 20 | 42.80% | 9.80E-06 | -1.79 |
| 54 | Electron transfer flavoprotein subunit alpha, mitochondrial          | ETF_A_MOUSE | 8.62 | 35,009 | 8  | 12 | 19 | 32.70% | 7.20E-07 | 3.09  |
| 55 | Voltage-dependent anion-selective channel protein 1                  | VDAC1_MOUSE | 8.55 | 32,351 | 11 | 14 | 21 | 48.30% | 0.0081   | 2.01  |
| 56 | Carbonyl reductase [NADPH] 1                                         | CBR1_MOUSE  | 8.53 | 30,510 | 6  | 6  | 7  | 24.90% | 0.0074   | 1.50  |
| 56 | Voltage-dependent anion-selective channel protein 1                  | VDAC1_MOUSE | 8.55 | 32,351 | 5  | 5  | 8  | 24.70% | 0.0074   | 1.50  |
| 57 | 2,4-dienoyl-CoA reductase, mitochondrial                             | DECR_MOUSE  | 8.78 | 32,451 | 5  | 5  | 9  | 20.00% | 0.012    | 1.87  |
| 58 | Voltage-dependent anion-selective channel protein 1                  | VDAC1_MOUSE | 8.55 | 32,351 | 8  | 9  | 16 | 38.90% | 6.00E-05 | 2.87  |
| 59 | 14-3-3 protein epsilon                                               | 1433E_MOUSE | 4.63 | 29,174 | 8  | 10 | 13 | 36.10% | 1.40E-06 | -2.94 |
| 60 | Complement component 1 Q subcomponent-binding protein, mitochondrial | C1QBP_MOUSE | 4.41 | 23,766 | 5  | 8  | 11 | 24.80% | 0.0015   | -2.66 |
| 61 | Electron transfer flavoprotein subunit beta                          | ETF_B_MOUSE | 8.29 | 27,492 | 11 | 18 | 29 | 43.10% | 0.0012   | -2.92 |
| 62 | Apolipoprotein A-I                                                   | APOA1_MOUSE | 5.31 | 27,950 | 9  | 11 | 18 | 36.70% | 3.10E-05 | -2.70 |
| 63 | Microtubule-associated protein RP/EB family member 1                 | MARE1_MOUSE | 5.12 | 29,885 | 3  | 3  | 5  | 14.60% | 0.00044  | -2.30 |
| 63 | Ubiquinone biosynthesis protein COQ9, mitochondrial                  | COQ9_MOUSE  | 4.93 | 30,241 | 3  | 3  | 5  | 12.80% | 0.00044  | -2.30 |
| 64 | Apolipoprotein A-I                                                   | APOA1_MOUSE | 5.31 | 27,950 | 7  | 9  | 14 | 29.20% | 1.30E-05 | -4.06 |
| 64 | Microtubule-associated protein RP/EB family member 1                 | MARE1_MOUSE | 5.12 | 29,885 | 7  | 9  | 18 | 36.20% | 1.30E-05 | -4.06 |
| 65 | Chloride intracellular channel protein 1                             | CLIC1_MOUSE | 5.09 | 26,882 | 10 | 12 | 18 | 52.30% | 0.00015  | -3.84 |
| 66 | Carbonic anhydrase 2                                                 | CAH2_MOUSE  | 6.48 | 28,901 | 5  | 6  | 11 | 24.60% | 0.01     | 1.50  |
| 66 | Bisphosphoglycerate mutase                                           | PMGE_MOUSE  | 6.56 | 29,847 | 5  | 5  | 8  | 24.30% | 0.01     | 1.50  |
| 67 | Phosphoglycerate mutase 1                                            | PGAM1_MOUSE | 6.75 | 28,701 | 10 | 17 | 26 | 50.00% | 1.60E-07 | -3.49 |
| 68 | Adenylate kinase 2, mitochondrial                                    | KAD2_MOUSE  | 6.96 | 26,469 | 5  | 6  | 9  | 24.70% | 0.013    | 1.16  |
| 68 | Phosphoglycerate mutase 1                                            | PGAM1_MOUSE | 6.75 | 28,701 | 5  | 6  | 8  | 33.50% | 0.013    | 1.16  |
| 69 | Adenylate kinase 2, mitochondrial                                    | KAD2_MOUSE  | 6.96 | 26,469 | 5  | 6  | 10 | 28.00% | 0.00053  | 1.71  |
| 69 | Electron transfer flavoprotein subunit beta                          | ETF_B_MOUSE | 8.29 | 27,492 | 8  | 8  | 11 | 31.40% | 0.00053  | 1.71  |
| 69 | Enoyl-CoA hydratase, mitochondrial                                   | ECHM_MOUSE  | 7.78 | 28,475 | 4  | 5  | 8  | 19.70% | 0.00053  | 1.71  |
| 70 | Enoyl-CoA hydratase, mitochondrial                                   | ECHM_MOUSE  | 7.78 | 28,475 | 9  | 11 | 18 | 30.00% | 0.0021   | 1.86  |
| 71 | Electron transfer flavoprotein subunit beta                          | ETF_B_MOUSE | 8.29 | 27,492 | 6  | 6  | 10 | 26.30% | 5.10E-06 | 2.00  |
| 71 | Enoyl-CoA hydratase, mitochondrial                                   | ECHM_MOUSE  | 7.78 | 28,475 | 6  | 7  | 12 | 19.70% | 5.10E-06 | 2.00  |
| 72 | Ubiquitin-conjugating enzyme E2 R1                                   | UB2R1_MOUSE | 4.44 | 26,622 | 2  | 2  | 4  | 9.36%  | 5.60E-06 | 2.31  |
| 73 | Electron transfer flavoprotein subunit beta                          | ETF_B_MOUSE | 8.29 | 27,492 | 9  | 12 | 22 | 41.60% | 2.70E-06 | 2.73  |

|                                                                                   |             |      |        |    |    |    |        |          |       |
|-----------------------------------------------------------------------------------|-------------|------|--------|----|----|----|--------|----------|-------|
| 73 Succinate dehydrogenase [ubiquinone] iron-sulfur subunit, mitochondrial        | DHSB_MOUSE  | 8.69 | 28,770 | 6  | 8  | 12 | 28.00% | 2.70E-06 | 2.73  |
| 73 Phosphoglycerate mutase 2                                                      | PGAM2_MOUSE | 8.65 | 28,827 | 8  | 10 | 16 | 30.40% | 2.70E-06 | 2.73  |
| 73 Enoyl-CoA delta isomerase 1, mitochondrial                                     | ECI1_MOUSE  | 8.23 | 29,224 | 6  | 9  | 15 | 26.00% | 2.70E-06 | 2.73  |
| 74 Coiled-coil-helix-coiled-coil-helix domain-containing protein 3, mitochondrial | CHCH3_MOUSE | 8.57 | 26,203 | 8  | 9  | 13 | 25.60% | 4.60E-05 | 1.77  |
| 74 Proteasome subunit alpha type-7                                                | PSA7_MOUSE  | 8.59 | 27,855 | 6  | 7  | 11 | 34.30% | 4.60E-05 | 1.77  |
| 74 Succinate dehydrogenase [ubiquinone] iron-sulfur subunit, mitochondrial        | DHSB_MOUSE  | 8.69 | 28,770 | 10 | 13 | 16 | 43.60% | 4.60E-05 | 1.77  |
| 75 Succinate dehydrogenase [ubiquinone] iron-sulfur subunit, mitochondrial        | DHSB_MOUSE  | 8.69 | 28,770 | 11 | 16 | 28 | 43.60% | 0.011    | 1.39  |
| 75 Phosphoglycerate mutase 2                                                      | PGAM2_MOUSE | 8.65 | 28,827 | 9  | 12 | 20 | 30.80% | 0.011    | 1.39  |
| 76 Translationally-controlled tumor protein                                       | TCTP_MOUSE  | 4.76 | 19,462 | 6  | 9  | 14 | 34.90% | 1.60E-05 | -2.42 |
| 77 Translationally-controlled tumor protein                                       | TCTP_MOUSE  | 4.76 | 19,462 | 7  | 10 | 19 | 41.90% | 7.80E-06 | -2.59 |
| 78 Myosin light chain 3                                                           | MYL3_MOUSE  | 5.03 | 22,290 | 8  | 13 | 23 | 52.50% | 6.40E-06 | 1.94  |
| 79 Myosin light chain 3                                                           | MYL3_MOUSE  | 5.03 | 22,290 | 13 | 21 | 53 | 70.60% | 1.60E-05 | 1.69  |
| 80 Myosin light chain 3                                                           | MYL3_MOUSE  | 5.03 | 22,290 | 10 | 13 | 22 | 57.40% | 0.00042  | 1.59  |
| 81 NADH dehydrogenase [ubiquinone] iron-sulfur protein 8, mitochondrial           | NDUS8_MOUSE | 5.13 | 20,442 | 4  | 6  | 11 | 25.90% | 0.0013   | 1.93  |
| 82 Osteoclast-stimulating factor 1                                                | OSTF1_MOUSE | 5.44 | 23,783 | 2  | 2  | 3  | 9.30%  | 0.001    | -2.42 |
| 82 Pre-mRNA-splicing factor SPF27                                                 | SPF27_MOUSE | 5.48 | 26,000 | 3  | 3  | 3  | 13.80% | 0.001    | -2.42 |
| 82 NADH dehydrogenase [ubiquinone] iron-sulfur protein 3, mitochondrial           | NDUS3_MOUSE | 5.45 | 26,479 | 3  | 3  | 3  | 14.10% | 0.001    | -2.42 |
| 83 Chloride intracellular channel protein 4                                       | CLIC4_MOUSE | 5.45 | 28,598 | 12 | 16 | 24 | 52.60% | 1.50E-06 | -3.88 |
| 84 Serum amyloid P-component                                                      | SAMP_MOUSE  | 5.97 | 26,247 | 6  | 8  | 15 | 24.10% | 0.0049   | -3.28 |
| 85 NADH dehydrogenase [ubiquinone] flavoprotein 2, mitochondrial                  | NDUV2_MOUSE | 5.31 | 23,847 | 11 | 20 | 33 | 55.60% | 1.40E-05 | 1.77  |
| 85 Apolipoprotein A-I                                                             | APOA1_MOUSE | 5.31 | 27,950 | 14 | 20 | 34 | 45.80% | 1.40E-05 | 1.77  |
| 86 Thioredoxin-dependent peroxide reductase, mitochondrial                        | PRDX3_MOUSE | 5.73 | 21,565 | 6  | 8  | 13 | 28.00% | 1.10E-05 | 2.22  |
| 86 BAG family molecular chaperone regulator 2                                     | BAG2_MOUSE  | 6.01 | 23,474 | 5  | 5  | 6  | 24.30% | 1.10E-05 | 2.22  |
| 87 Peroxiredoxin-4                                                                | PRDX4_MOUSE | 5.83 | 26,476 | 8  | 8  | 13 | 45.30% | 6.50E-05 | -5.27 |
| 88 28 kDa heat- and acid-stable phosphoprotein                                    | HAP28_MOUSE | 6.80 | 20,605 | 3  | 3  | 5  | 19.30% | 1.20E-05 | -2.14 |
| 88 Heat shock protein beta-1                                                      | HSPB1_MOUSE | 6.12 | 23,014 | 5  | 5  | 8  | 24.90% | 1.20E-05 | -2.14 |
| 89 Alpha-crystallin B chain                                                       | CRYAB_MOUSE | 6.76 | 20,069 | 7  | 7  | 10 | 46.90% | 1.30E-05 | 1.99  |
| 90 ES1 protein homolog, mitochondrial                                             | ES1_MOUSE   | 7.31 | 23,920 | 9  | 16 | 29 | 44.00% | 6.80E-06 | 3.11  |
| 90 Glutathione S-transferase Mu 2                                                 | GSTM2_MOUSE | 7.31 | 25,586 | 10 | 13 | 22 | 44.50% | 6.80E-06 | 3.11  |
| 91 NADH dehydrogenase [ubiquinone] 1 beta subcomplex subunit 9                    | NDUB9_MOUSE | 7.84 | 21,853 | 3  | 5  | 8  | 21.20% | 1.40E-06 | 2.76  |
| 91 Glutathione S-transferase P 1                                                  | GSTP1_MOUSE | 8.13 | 23,478 | 5  | 6  | 14 | 31.90% | 1.40E-06 | 2.76  |
| 92 Peroxiredoxin-1                                                                | PRDX1_MOUSE | 8.26 | 22,045 | 7  | 9  | 15 | 45.70% | 4.80E-06 | 2.91  |
| 93 Glutathione S-transferase Mu 1                                                 | GSTM1_MOUSE | 8.14 | 25,839 | 6  | 9  | 16 | 40.40% | 0.00044  | 2.78  |
| 94 NADH dehydrogenase [ubiquinone] 1 beta subcomplex subunit 10                   | NDUBA_MOUSE | 8.19 | 21,024 | 8  | 11 | 17 | 46.00% | 0.00018  | 1.95  |
| 94 Glutathione S-transferase P 1                                                  | GSTP1_MOUSE | 8.13 | 23,478 | 8  | 9  | 16 | 48.10% | 0.00018  | 1.95  |
| 95 Protein NipSnap homolog 2                                                      | NIPS2_MOUSE | 9.31 | 32,933 | 3  | 5  | 9  | 11.70% | 3.40E-05 | 2.06  |
| 96 GTP:AMP phosphotransferase AK3, mitochondrial                                  | KAD3_MOUSE  | 8.88 | 25,295 | 3  | 3  | 6  | 16.70% | 0.0029   | 1.76  |
| 96 Protein NipSnap homolog 2                                                      | NIPS2_MOUSE | 9.31 | 32,933 | 4  | 4  | 8  | 17.40% | 0.0029   | 1.76  |
| 97 Myosin light chain 4                                                           | MYL4_MOUSE  | 4.96 | 21,159 | 8  | 11 | 17 | 50.30% | 0.001    | -2.20 |
| 98 Myosin light chain 4                                                           | MYL4_MOUSE  | 4.96 | 21,159 | 5  | 9  | 15 | 32.10% | 0.033    | -1.26 |
| 99 Myosin light chain 4                                                           | MYL4_MOUSE  | 4.96 | 21,159 | 6  | 7  | 10 | 36.80% | 0.00038  | -1.74 |
| 99 Peroxiredoxin-2                                                                | PRDX2_MOUSE | 5.20 | 21,647 | 7  | 8  | 13 | 49.00% | 0.00038  | -1.74 |
| 100 Chromobox protein homolog 3                                                   | CBX3_MOUSE  | 5.13 | 20,855 | 6  | 8  | 14 | 36.60% | 0.00072  | -3.55 |
| 101 39S ribosomal protein L12, mitochondrial                                      | RM12_MOUSE  | 5.35 | 16,653 | 4  | 4  | 7  | 24.40% | 5.30E-05 | -3.13 |
| 102 ATP synthase subunit d, mitochondrial                                         | ATP5H_MOUSE | 5.53 | 18,618 | 8  | 8  | 15 | 53.40% | 8.60E-07 | 3.32  |
| 103 Adenylate kinase isoenzyme 1                                                  | KAD1_MOUSE  | 5.67 | 21,540 | 8  | 9  | 17 | 50.00% | 1.10E-05 | 2.29  |
| 104 ATP synthase subunit d, mitochondrial                                         | ATP5H_MOUSE | 5.53 | 18,618 | 2  | 2  | 2  | 18.00% | 0.0038   | 2.17  |
| 105 ATP synthase subunit d, mitochondrial                                         | ATP5H_MOUSE | 5.53 | 18,618 | 14 | 20 | 36 | 80.70% | 2.70E-06 | 2.19  |
| 106 Ferritin heavy chain                                                          | FRIH_MOUSE  | 5.53 | 21,067 | 4  | 5  | 8  | 27.50% | 0.0015   | 1.56  |
| 107 Putative hydrolase RBBP9                                                      | RBBP9_MOUSE | 5.62 | 20,912 | 5  | 6  | 10 | 26.90% | 0.0034   | -2.53 |
| 108 Ferritin light chain 1                                                        | FRIL1_MOUSE | 5.65 | 20,802 | 9  | 14 | 26 | 61.20% | 0.011    | -1.85 |
| 109 Coactosin-like protein                                                        | COTL1_MOUSE | 5.23 | 15,813 | 1  | 1  | 1  | 5.63%  | 0.00015  | -2.96 |
| 110 Tubulin-specific chaperone A                                                  | TBCA_MOUSE  | 5.25 | 12,626 | 6  | 9  | 14 | 38.90% | 0.0077   | -2.04 |
| 111 Programmed cell death protein 5                                               | PDCD5_MOUSE | 5.56 | 14,144 | 4  | 6  | 10 | 37.30% | 1.70E-06 | -3.30 |

|     |                                                                      |             |      |        |    |    |    |        |          |        |
|-----|----------------------------------------------------------------------|-------------|------|--------|----|----|----|--------|----------|--------|
| 112 | Retinol-binding protein 1                                            | RET1_MOUSE  | 5.11 | 15,715 | 8  | 12 | 22 | 54.80% | 6.50E-06 | -3.23  |
| 113 | Retinol-binding protein 1                                            | RET1_MOUSE  | 5.11 | 15,715 | 6  | 8  | 10 | 47.40% | 0.0018   | 2.40   |
| 114 | Cytochrome c oxidase subunit 5A, mitochondrial                       | COX5A_MOUSE | 5.01 | 12,436 | 5  | 6  | 12 | 43.20% | 6.70E-06 | 2.30   |
| 115 | Cytochrome c oxidase subunit 5A, mitochondrial                       | COX5A_MOUSE | 5.01 | 12,436 | 3  | 4  | 8  | 21.90% | 0.0011   | 2.29   |
| 116 | Unidentified                                                         | -           | -    | -      | -  | -  | -  | -      | 1.20E-06 | 2.90   |
| 117 | Fatty acid-binding protein, heart                                    | FABPH_MOUSE | 6.15 | 14,688 | 7  | 11 | 16 | 55.60% | 3.80E-07 | 6.93   |
| 118 | Fatty acid-binding protein, heart                                    | FABPH_MOUSE | 6.15 | 14,688 | 2  | 3  | 4  | 21.10% | 0.00072  | 2.67   |
| 119 | Costars family protein ABRACL                                        | ABRAL_MOUSE | 5.49 | 9,030  | 1  | 1  | 2  | 11.10% | 5.60E-05 | 2.66   |
| 120 | Fatty acid-binding protein, epidermal                                | FABP5_MOUSE | 6.18 | 15,006 | 2  | 2  | 4  | 25.20% | 0.004    | -2.82  |
| 121 | Fatty acid-binding protein, heart                                    | FABPH_MOUSE | 6.15 | 14,688 | 4  | 4  | 7  | 28.60% | 1.30E-07 | 6.74   |
| 122 | Fatty acid-binding protein, heart                                    | FABPH_MOUSE | 6.15 | 14,688 | 4  | 5  | 7  | 31.60% | 0.0054   | 4.31   |
| 123 | Fatty acid-binding protein, heart                                    | FABPH_MOUSE | 6.15 | 14,688 | 11 | 16 | 30 | 72.20% | 7.00E-08 | 6.94   |
| 124 | Enhancer of rudimentary homolog                                      | ERH_MOUSE   | 5.62 | 12,128 | 2  | 4  | 7  | 26.90% | 3.90E-08 | -5.03  |
| 125 | Cytochrome c oxidase subunit 5B, mitochondrial                       | COX5B_MOUSE | 5.74 | 10,718 | 3  | 4  | 7  | 24.20% | 1.40E-06 | 2.89   |
| 126 | Cytochrome c oxidase subunit 5B, mitochondrial                       | COX5B_MOUSE | 5.74 | 10,718 | 5  | 6  | 8  | 29.70% | 8.70E-06 | 2.74   |
| 127 | Stathmin                                                             | STMN1_MOUSE | 5.76 | 17,143 | 7  | 10 | 17 | 32.20% | 1.80E-09 | -23.63 |
| 128 | Heat shock protein beta-7                                            | HSPB7_MOUSE | 5.95 | 18,635 | 5  | 7  | 13 | 37.30% | 0.0014   | -1.92  |
| 129 | Ubiquitin-conjugating enzyme E2 N                                    | UBE2N_MOUSE | 6.13 | 17,138 | 5  | 6  | 10 | 40.80% | 0.00013  | -2.02  |
| 130 | Fatty acid-binding protein, epidermal                                | FABP5_MOUSE | 6.18 | 15,006 | 2  | 2  | 2  | 14.80% | 4.70E-05 | -4.33  |
| 131 | Fatty acid-binding protein, epidermal                                | FABP5_MOUSE | 6.18 | 15,006 | 7  | 10 | 17 | 73.30% | 4.10E-07 | -6.69  |
| 132 | Transthyretin                                                        | TTHY_MOUSE  | 5.77 | 15,776 | 5  | 7  | 14 | 28.60% | 0.0078   | -1.61  |
| 133 | 40S ribosomal protein S12                                            | RS12_MOUSE  | 7.02 | 14,394 | 2  | 2  | 2  | 20.50% | 6.60E-05 | -2.36  |
| 134 | 40S ribosomal protein S12                                            | RS12_MOUSE  | 7.02 | 14,394 | 3  | 4  | 7  | 22.00% | 5.60E-06 | -4.18  |
| 135 | Nucleoside diphosphate kinase B                                      | NDKB_MOUSE  | 7.17 | 17,232 | 6  | 9  | 15 | 46.10% | 0.00042  | 5.60   |
| 136 | Peptidyl-prolyl cis-trans isomerase A                                | PPIA_MOUSE  | 7.73 | 17,971 | 11 | 17 | 31 | 74.40% | 0.05     | -1.73  |
| 137 | Myoglobin                                                            | MYG_MOUSE   | 7.23 | 16,938 | 6  | 9  | 12 | 48.70% | 0.0003   | 3.06   |
| 138 | Unidentified                                                         | -           | -    | -      | -  | -  | -  | -      | 2.20E-05 | 2.90   |
| 139 | Cofilin-1                                                            | COF1_MOUSE  | 8.26 | 18,428 | 8  | 9  | 13 | 47.60% | 1.80E-05 | -4.65  |
| 140 | Peptidyl-prolyl cis-trans isomerase A                                | PPIA_MOUSE  | 7.73 | 17,971 | 10 | 16 | 27 | 66.50% | 4.20E-05 | 5.86   |
| 141 | NADH dehydrogenase [ubiquinone] 1 beta subcomplex subunit 7          | NDUB7_MOUSE | 8.38 | 16,200 | 5  | 5  | 9  | 44.50% | 0.0032   | -1.88  |
| 141 | Destrin                                                              | DEST_MOUSE  | 8.19 | 18,390 | 6  | 7  | 10 | 40.60% | 0.0032   | -1.88  |
| 142 | Myoglobin                                                            | MYG_MOUSE   | 7.23 | 16,938 | 10 | 16 | 30 | 65.60% | 6.50E-06 | 9.75   |
| 143 | Peroxisredoxin-5, mitochondrial                                      | PRDX5_MOUSE | 7.70 | 17,015 | 10 | 12 | 20 | 49.00% | 2.90E-05 | 3.49   |
| 144 | Myoglobin                                                            | MYG_MOUSE   | 7.23 | 16,938 | 7  | 10 | 14 | 61.70% | 0.00027  | 4.38   |
| 145 | Unidentified                                                         | -           | -    | -      | -  | -  | -  | -      | 5.10E-05 | 2.19   |
| 146 | Unidentified                                                         | -           | -    | -      | -  | -  | -  | -      | 2.40E-07 | 9.14   |
| 147 | Protein S100-A13                                                     | S10AD_MOUSE | 5.89 | 11,158 | 2  | 2  | 4  | 20.40% | 0.00031  | 5.02   |
| 148 | ATP synthase-coupling factor 6, mitochondrial                        | ATP5J_MOUSE | 5.40 | 8,945  | 4  | 5  | 7  | 40.70% | 1.60E-05 | 4.73   |
| 149 | NADH dehydrogenase [ubiquinone] iron-sulfur protein 6, mitochondrial | NDUS6_MOUSE | 8.86 | 13,020 | 7  | 10 | 18 | 65.50% | 0.023    | 2.16   |
| 150 | Acylphosphatase-2                                                    | ACYP2_MOUSE | 9.30 | 11,878 | 5  | 5  | 6  | 34.00% | 0.00075  | 2.65   |
| 151 | Cytochrome c oxidase subunit 6B1                                     | CX6B1_MOUSE | 8.97 | 9,940  | 7  | 7  | 12 | 66.30% | 0.0049   | 3.17   |

**Supplementary Figure 1. DIGE Analysis. A)** Differentially expressed proteins between the adult mouse heart versus zebrafish (ZF) heart (**Supplementary Tables 2 and 3**, respectively). **B)** Differentially expressed proteins between the neonatal and adult mouse heart. Note that in panel B results of **Fig. 1B** were reproduced with different biological replicates using a dye swap. The numbered spots were analysed by LC-MS/MS.

**A**

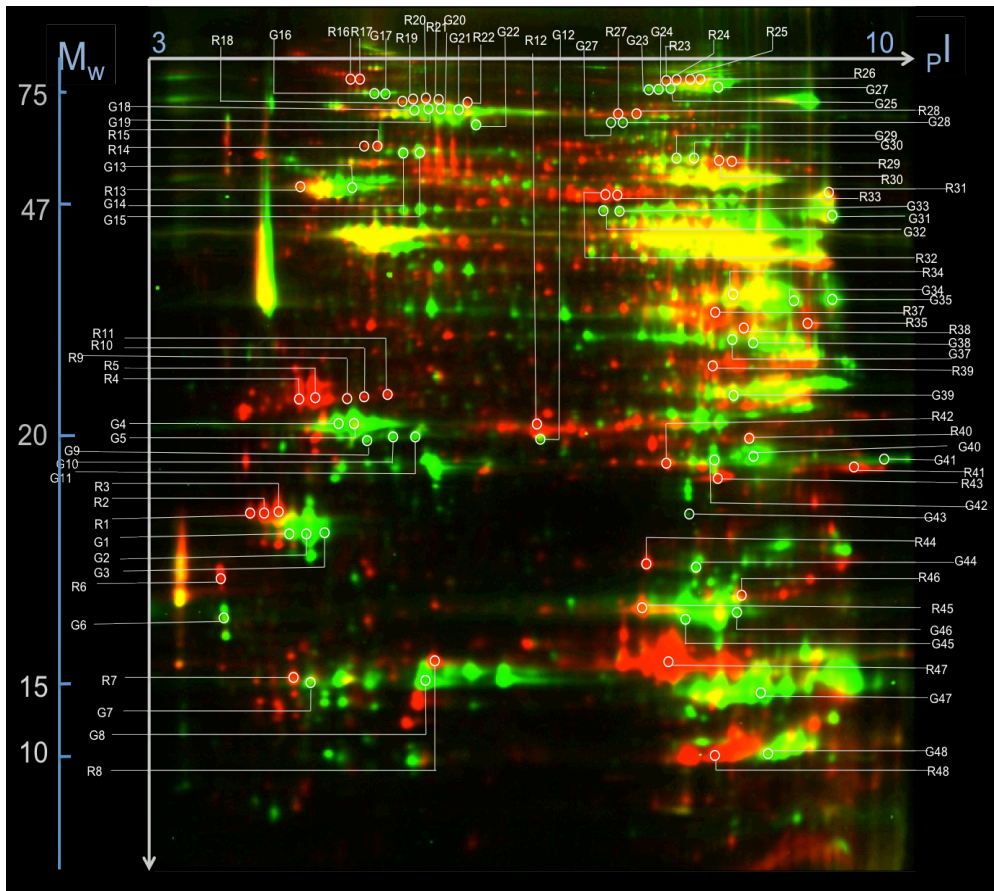

**B**

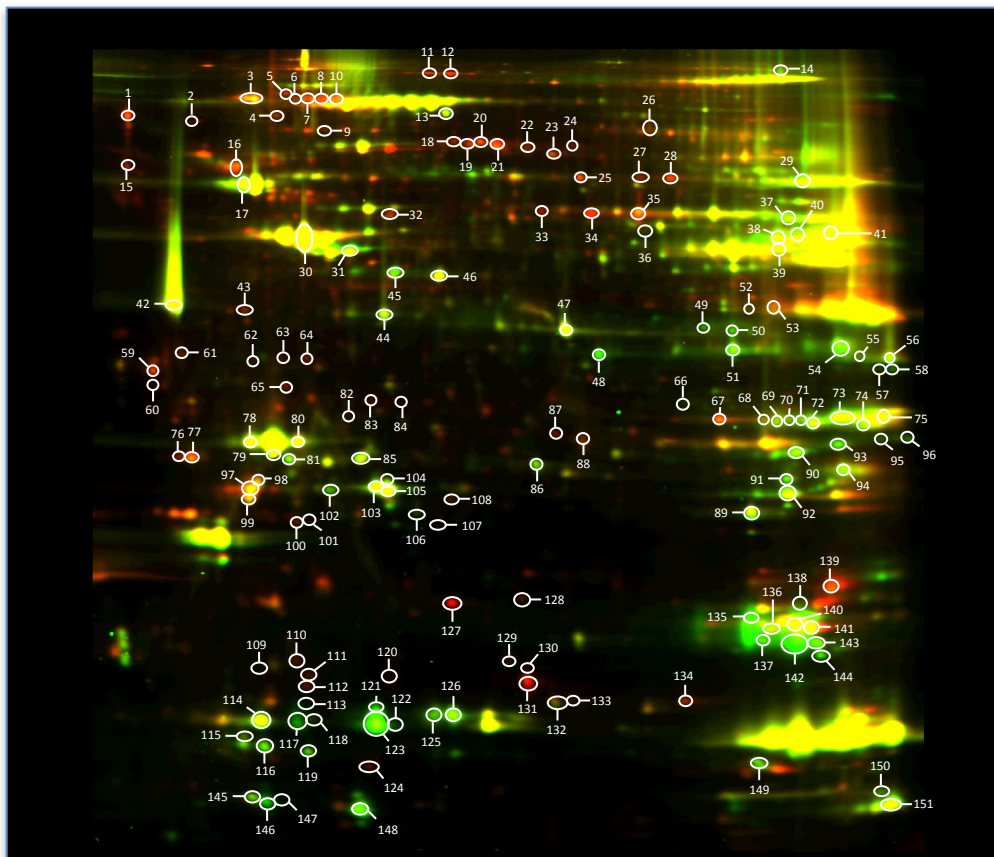

**Supplementary Figure 2. Enrichment Analysis.** Enrichment for biological processes, cellular localisation and molecular function for the proteins identified by DIGE, in adult mice and adult zebrafish (ZF) hearts (Supplementary Tables 2 and 3).

### Adult Mouse Heart

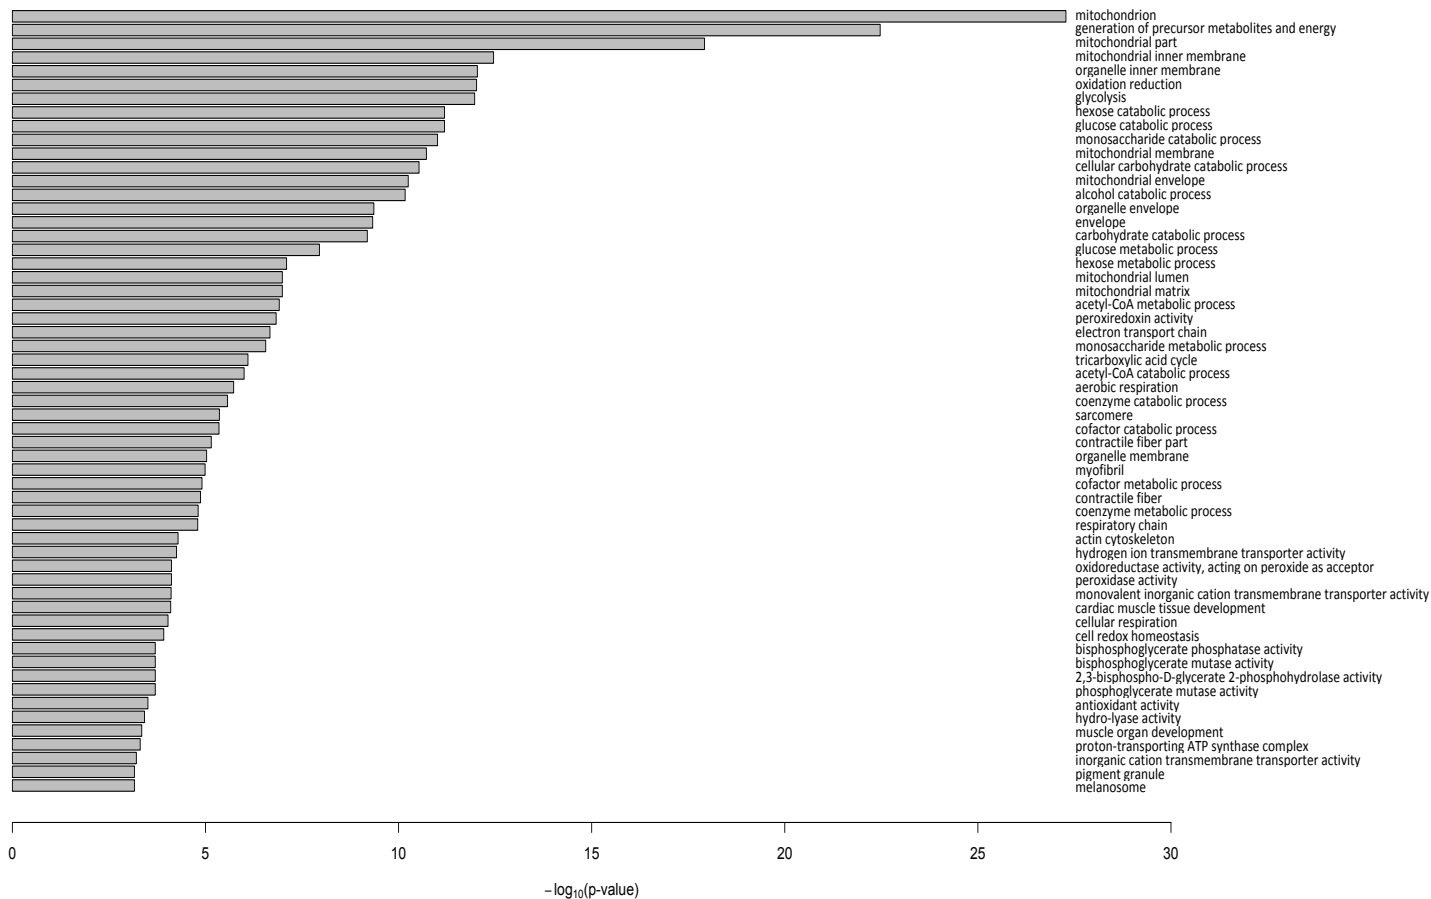

### Adult ZF Heart

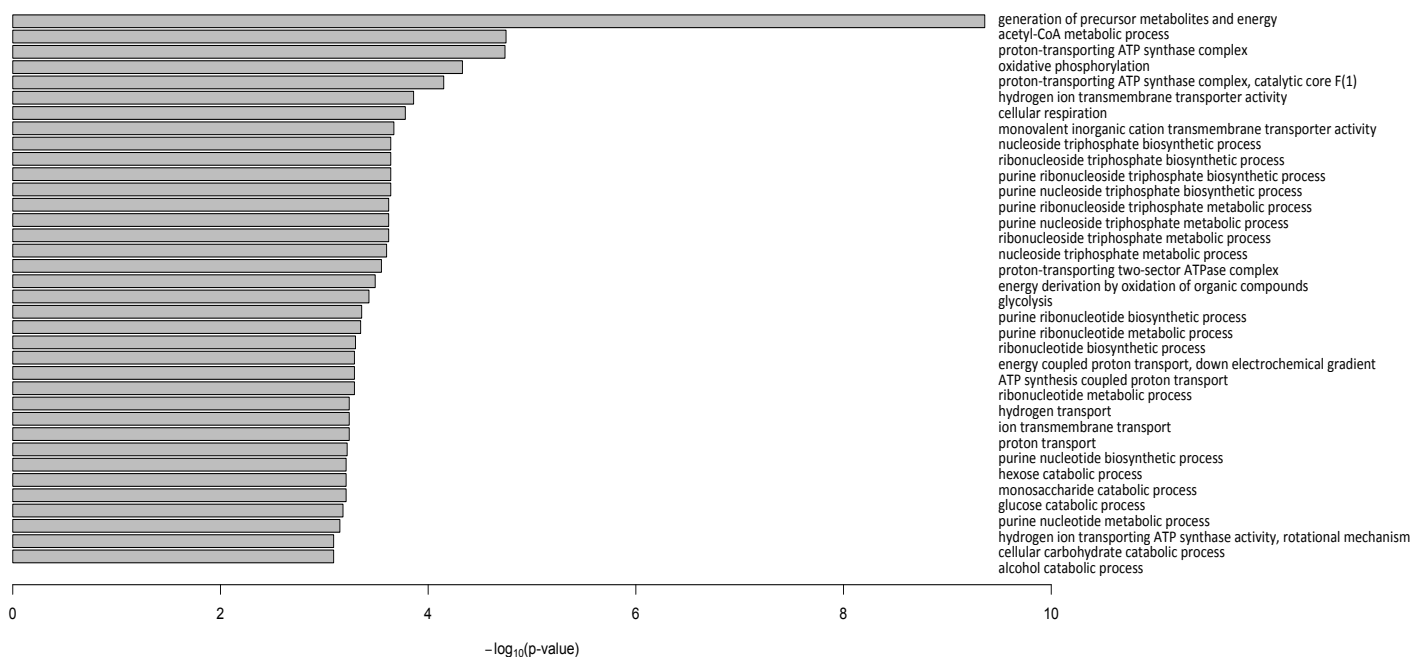

**Supplementary Figure 3. Western Blot Analysis.** A) Myozenin, nebullette and troponin T were proteins of interest in the DIGE analysis. Further immunoblot analyses were performed to corroborate the proteomics data. However, most antibodies are not validated for zebrafish. Thus, we cannot determine if the protein is absent or simply not recognised by the antibody. Note the different troponin T isoform in zebrafish at 25kDa. B) Densitometry quantitation. \*\* P<0.01, \*\*\* P<0.001. ZF, denotes “adult zebrafish”.

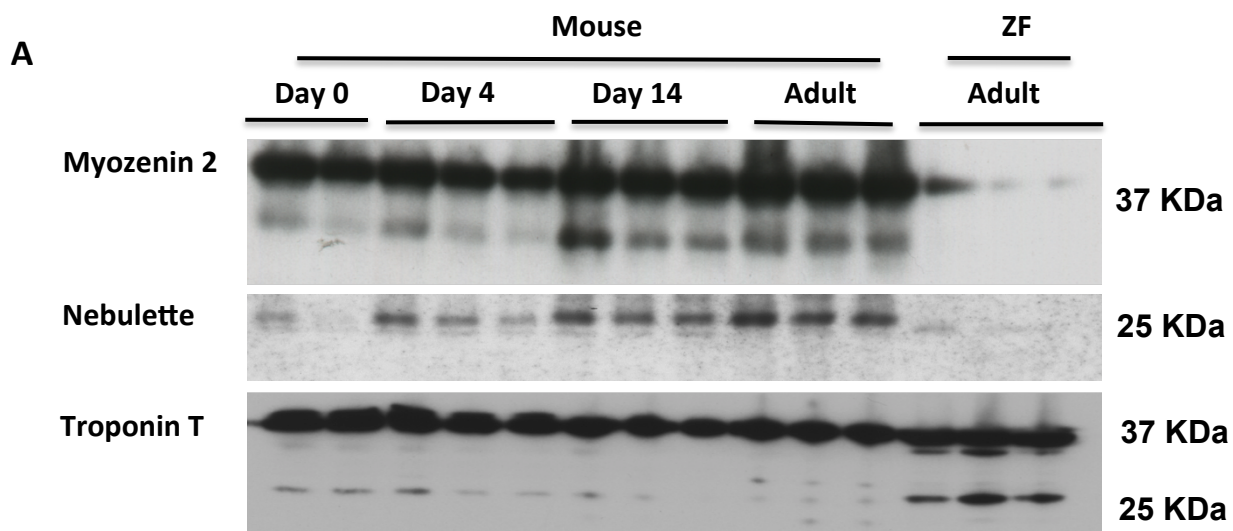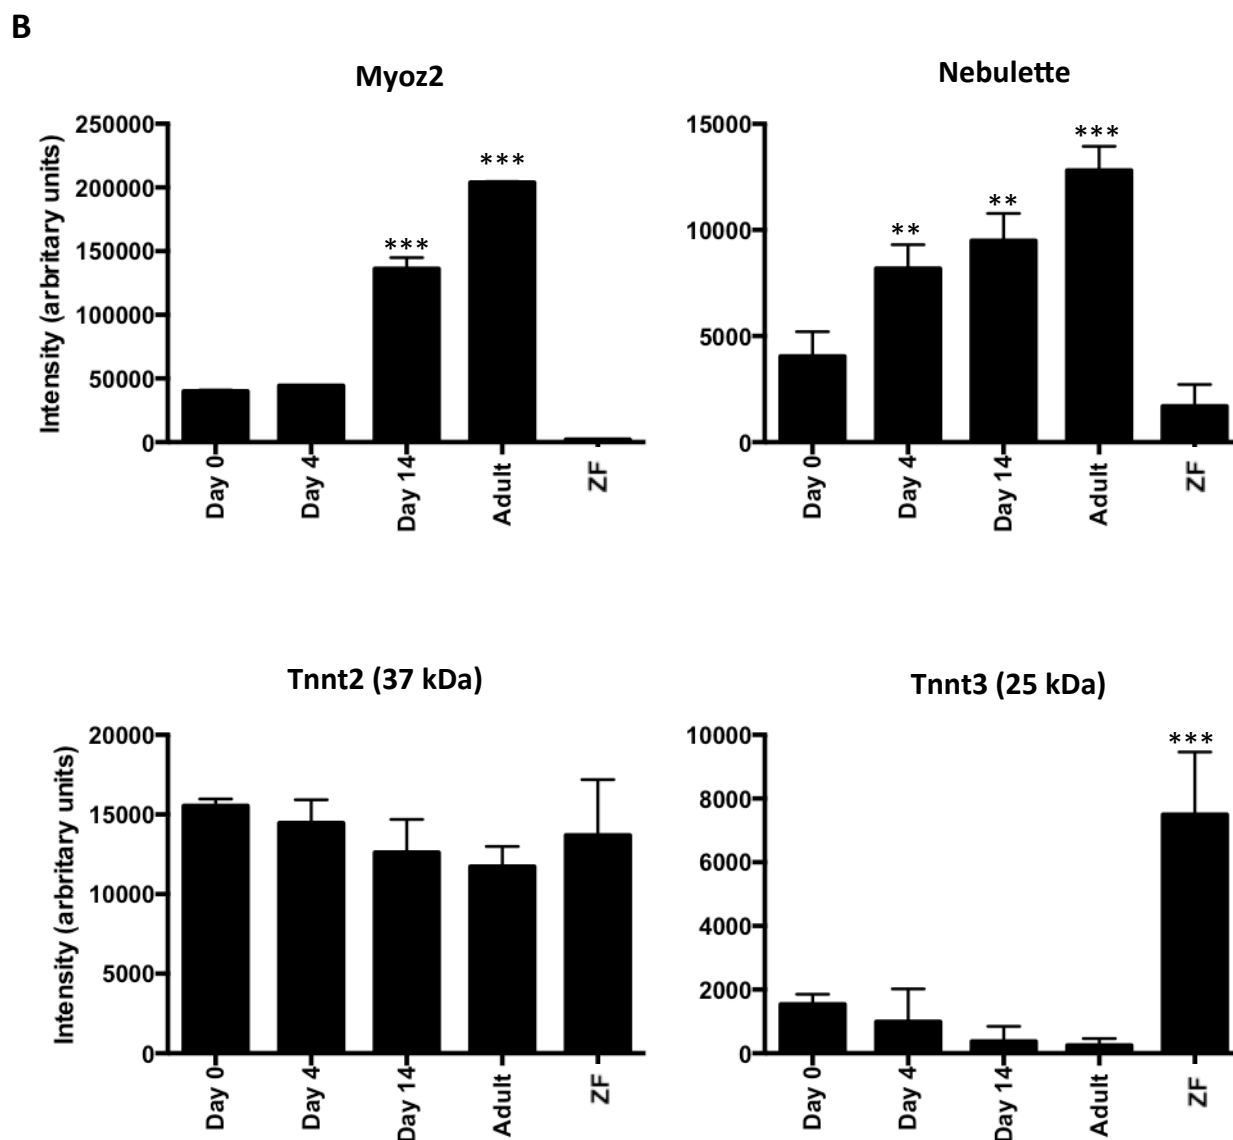



**Supplementary Figure 4. qPCR Analysis.** In order to compare gene expression between two species in a given gene family, a gene from that family that did not change significantly over time was used as the normalisation control as indicated. For *myoz1* and *myoz2*, 18S RNA was used as an endogenous control. The relative abundance was ranked from lowest to highest expression (+, ++, +++) in neonatal mouse, adult mouse and adult zebrafish (ZF) hearts. The absence of expression or very low levels was denoted by (-). Summary in Fig. 2A.

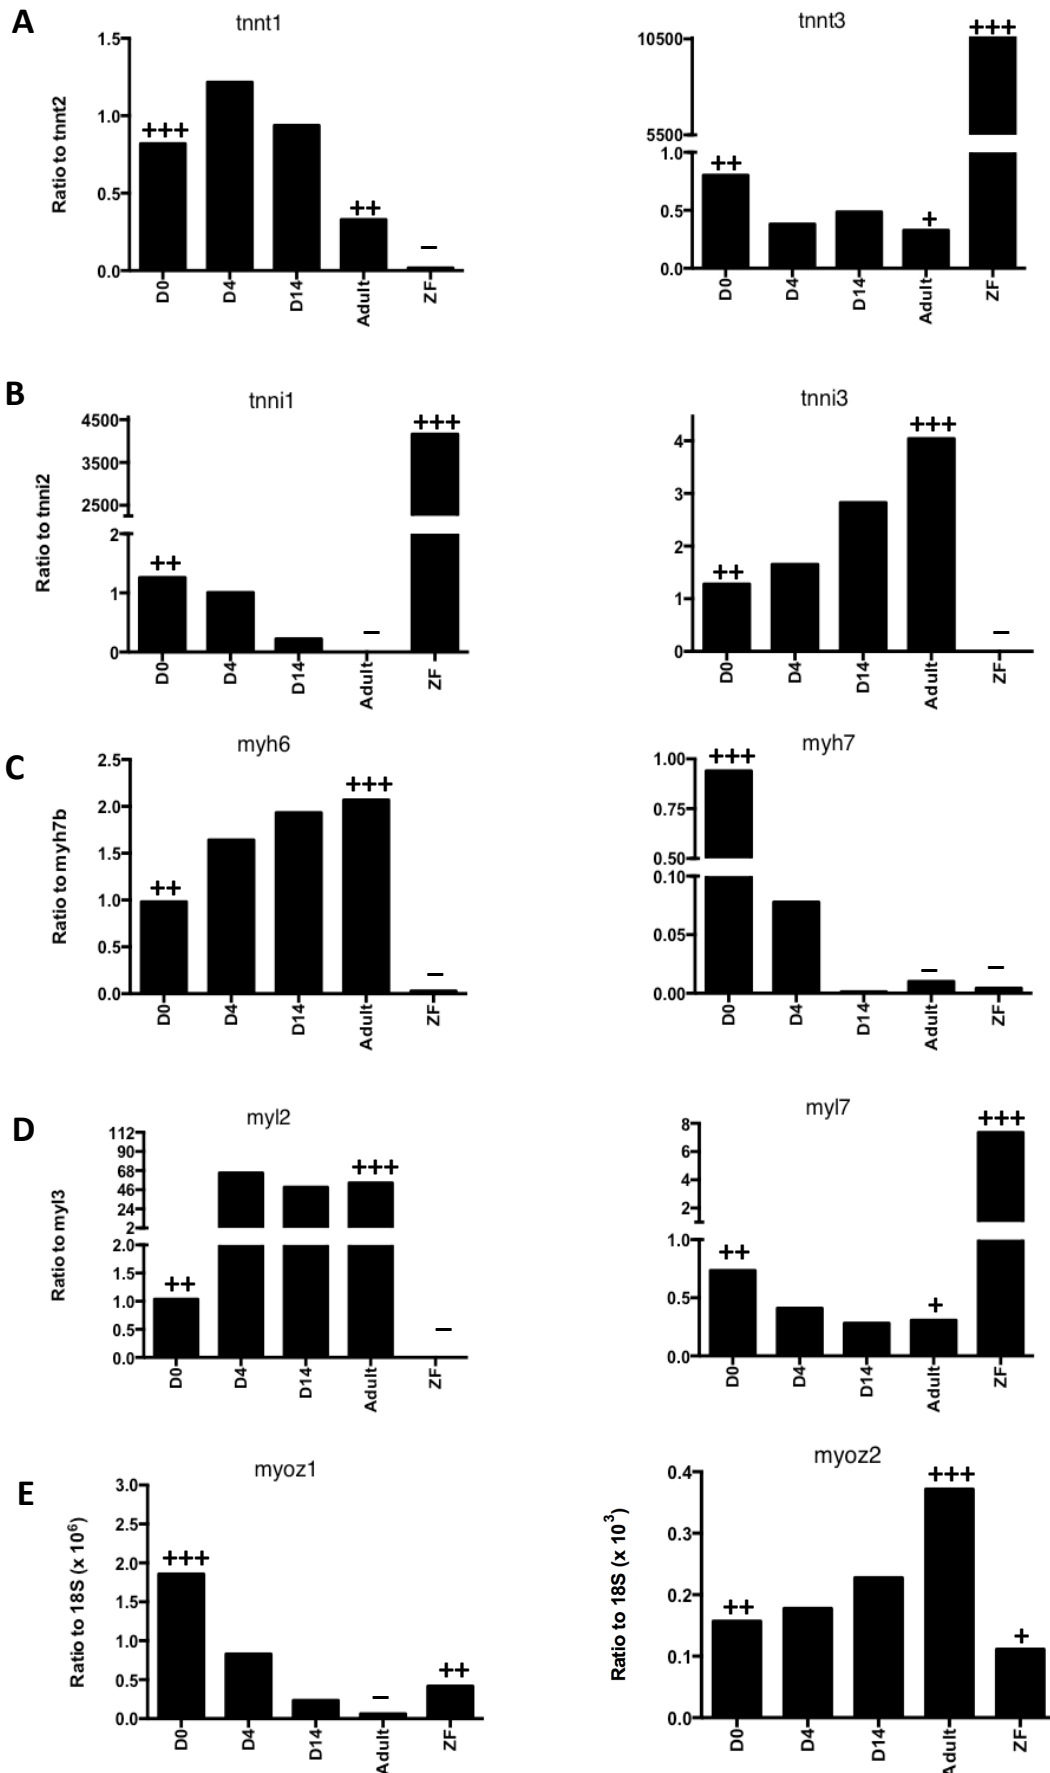

Supplement: mmc1.pdf [file mmc1.pdf]
